# Supplementary material for: Iminodiacetic acid functionalized magnetic nanoparticles for speciation of Cr(iii) and Cr(vi) followed by graphite furnace atomic absorption spectrometry detection
Source: Royal Society of Chemistry journal article supplement (doi:10.1039/c6ra27544c), 2017-01-01
Supplement: c6ra27544c1.pdf [file c6ra27544c1.pdf]

# Iminodiacetic Acid Functionalized Magnetic Nanoparticles for Speciation of Cr (III) and Cr (VI) Followed by Graphite Furnace Atomic Absorption Spectrometry Detection

Wenye Wei, Bingshan Zhao, Man He\*, Beibei Chen, Bin Hu  
Key Laboratory of Analytical Chemistry for Biology and Medicine (Ministry of  
Education), Department of Chemistry, Wuhan University, Wuhan 430072, China

\*Corresponding author: Dr. Man He, E-mail: heman@whu.edu.cn, Fax: 86-27-68754067, Tel: 86-27-68752162

## Electronic supplementary information

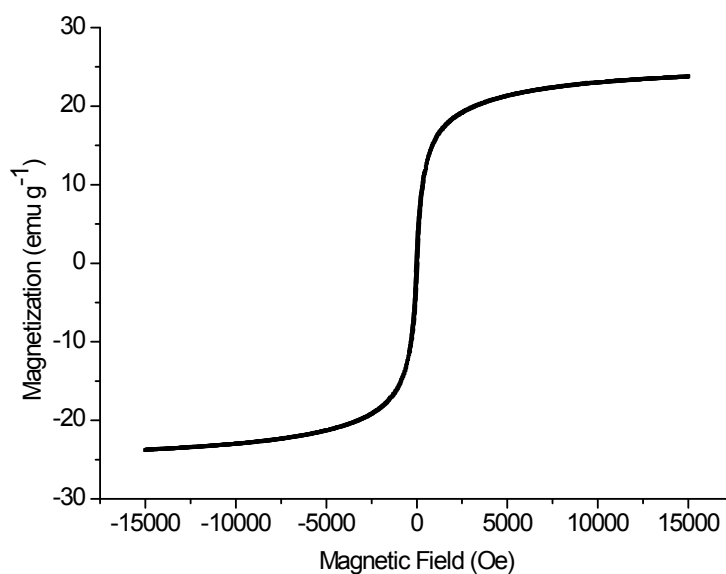

**Fig. S1** Magnetic hysteresis loop of Fe<sub>3</sub>O<sub>4</sub>@SiO<sub>2</sub>@IDA.

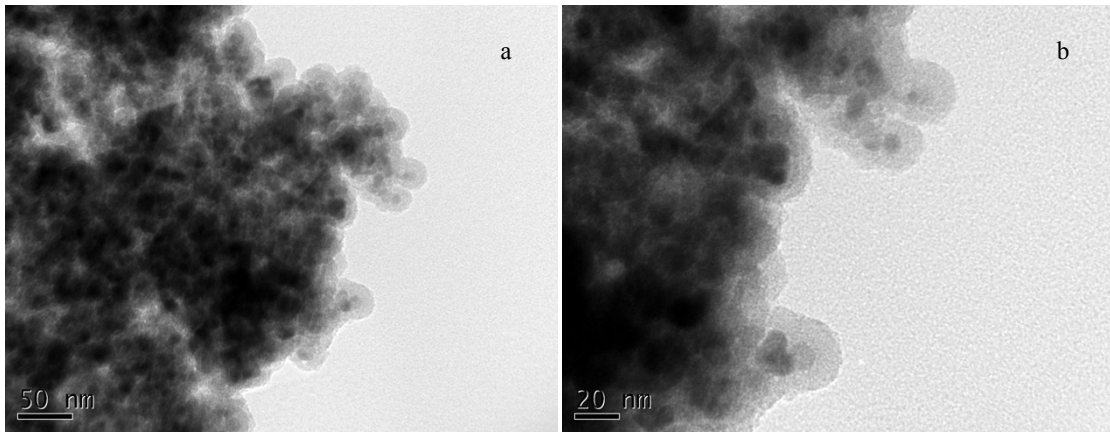

**Fig. S2** TEM images of Fe<sub>3</sub>O<sub>4</sub>@SiO<sub>2</sub>@IDA (Magnifications: 300000 x(a), 500000 x(b)).

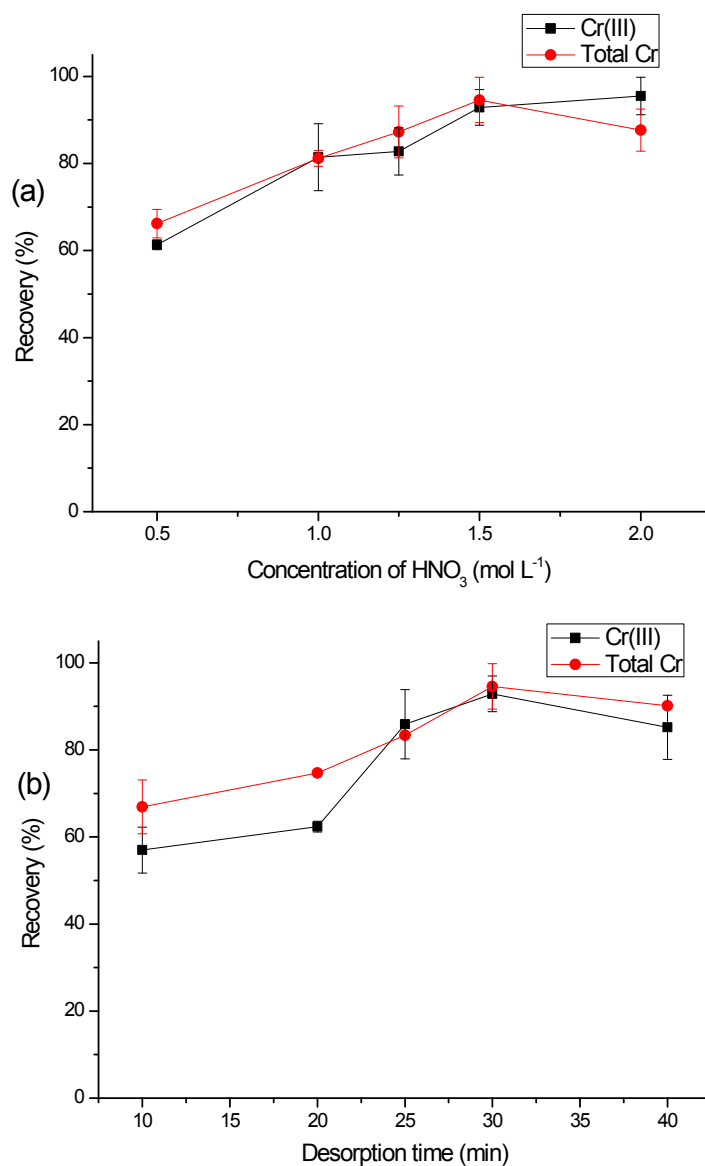

**Fig. S3** Optimization of desorption conditions. Conditions: materials, 10 mg; sample volume, 0.5 mL; concentration, 10  $\mu\text{g}\cdot\text{L}^{-1}$ ; pH, 5(Cr(III)), 3(total Cr); ultrasound extraction time, 20 min. (a) Effect of HNO<sub>3</sub> concentration: desorption volume, 0.5 mL; desorption time, 30 min. (b) Effect of desorption time: desorption reagent, 1.5 mol·L<sup>-1</sup> HNO<sub>3</sub>; desorption volume, 0.5 mL. Error bars show the standard deviation (n= 3).

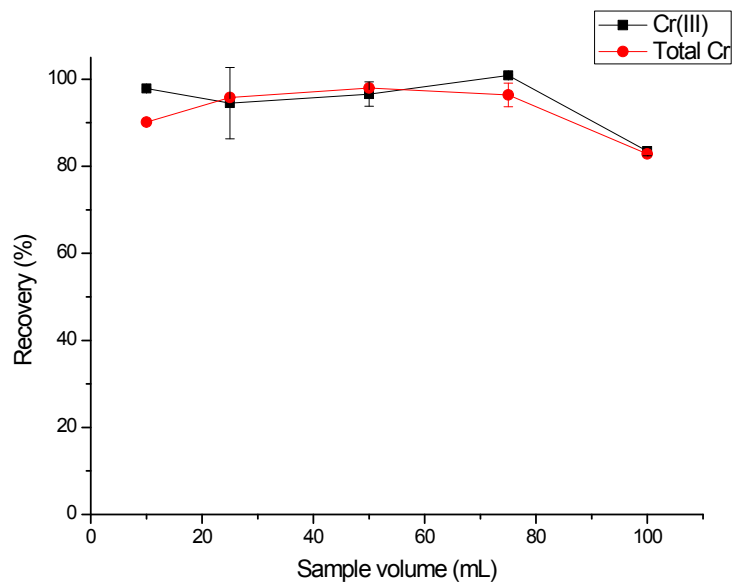

**Fig. S4** Effect of sample volume on the recovery of Cr(III) and total Cr. Conditions: materials, 10 mg; mass of metal ion, 5 ng; pH, 5(Cr(III)), 3(total Cr); ultrasound extraction time, 20 min; desorption reagent, 1.5 mol L<sup>-1</sup> HNO<sub>3</sub>; desorption volume, 0.5 mL; ultrasound desorption time, 30 min. Error bars show the standard deviation (n= 3).

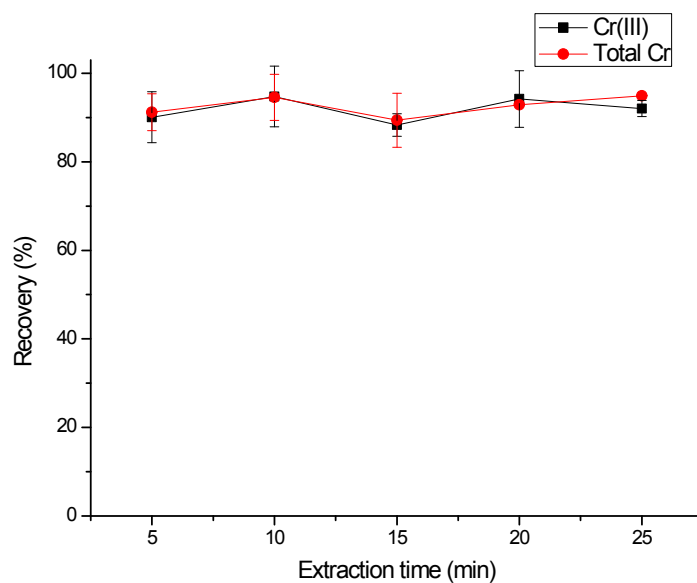

**Fig. S5** Effect of extraction time on the recovery of Cr(III) and total Cr. Conditions: materials, 10 mg; sample volume, 50 mL; concentration,  $0.1 \mu\text{g L}^{-1}$ ; pH, 5(Cr(III)), 3(total Cr); desorption reagent,  $1.5 \text{ mol L}^{-1} \text{ HNO}_3$ ; desorption volume, 0.5 mL; ultrasound desorption time, 30 min. Error bars show the standard deviation ( $n=3$ ).

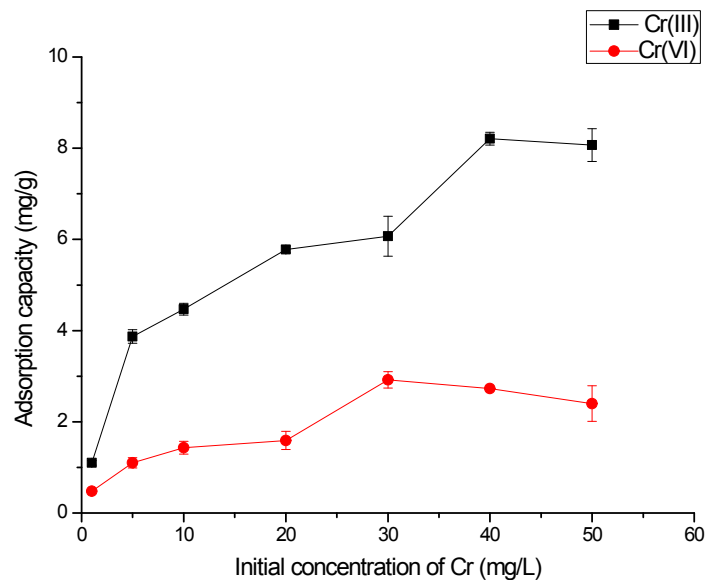

**Fig.S6** Adsorption capacity of Cr(III) and Cr(VI) on  $\text{Fe}_3\text{O}_4@\text{SiO}_2@\text{IDA}$ . Conditions: sample volume, 10 mL; pH, 5(Cr(III)), 3(Cr(VI)); ultrasound adsorption time, 10 min; materials, 10 mg. Error bars show the standard deviation (n= 3).

**Table S1** Optimized operating conditions for GFAAS

| Graphite Furnace         |                            |      |         |      |
|--------------------------|----------------------------|------|---------|------|
| Lamp current             | 7.5 mA                     |      |         |      |
| Wavelength               | 359.3 nm                   |      |         |      |
| Spectral bandpass        | 1.3 nm                     |      |         |      |
| Cuvette type             | Pyto Tube HR               |      |         |      |
| Carrier gas(Atomization) | 30 mL/min                  |      |         |      |
| Sample volume            | 20 $\mu$ L                 |      |         |      |
| Temperature program      |                            |      |         |      |
| Stage                    | Temperature( $^{\circ}$ C) |      | Time(s) |      |
|                          | Start                      | End  | Ramp    | Hold |
| 1. Drying                | 80                         | 140  | 40      |      |
| 2. Ashing                | 700                        | 700  | 20      |      |
| 3. Atomization           | 2600                       | 2600 |         | 5    |
| 4. Cleaning              | 2700                       | 2700 |         | 4    |
